# Supplementary material
Source: publisher figshare collection journal article supplement (https://acs.figshare.com/ndownloader/files/12560231)
Supplement: Supplementary file 1 [file 12560231]

## SUPPORTING INFORMATION

### One-pot rapid synthesis of Mo(S,Se)<sub>2</sub> nanosheets on graphene for highly efficient hydrogen evolution

Yuta Nakayasu<sup>1</sup>, Yoji Yasui<sup>1</sup>, Ryosuke Taniki<sup>1</sup>, Kotaro Oizumi<sup>1</sup>, Hiroaki Kobayashi<sup>1</sup>, Naoka Nagamura<sup>2</sup>, Takaaki Tomai<sup>1,\*</sup> and Itaru Honma<sup>1</sup>

1. *Institute of Multidisciplinary Research for Advanced Materials, Tohoku University, 2-1-1, Katahira, Aoba-ku, Sendai, Miyagi, 980-8577, Japan*

2. *National Institute for Materials Science, 1-2-1 Sengen, Tsukuba, Ibaraki, 305-0047, Japan*

\* Corresponding author: E-mail: [tomai@tagen.tohoku.ac.jp](mailto:tomai@tagen.tohoku.ac.jp)

Tel: 022(217)5816; Fax: 022(217)5828

Total number of pages: 11

Total number of figures: 7

Total number of tables: 1

#### Table of Contents

|                                                  |     |
|--------------------------------------------------|-----|
| Figure S1.....                                   | S2  |
| Figure S2.....                                   | S3  |
| Description of Hansen solubility parameters..... | S4  |
| Figure S3.....                                   | S6  |
| Figure S4.....                                   | S7  |
| Figure S5.....                                   | S8  |
| Figure S6.....                                   | S9  |
| Figure S7.....                                   | S10 |
| Table S1.....                                    | S7  |
| REFERENCE.....                                   | S11 |

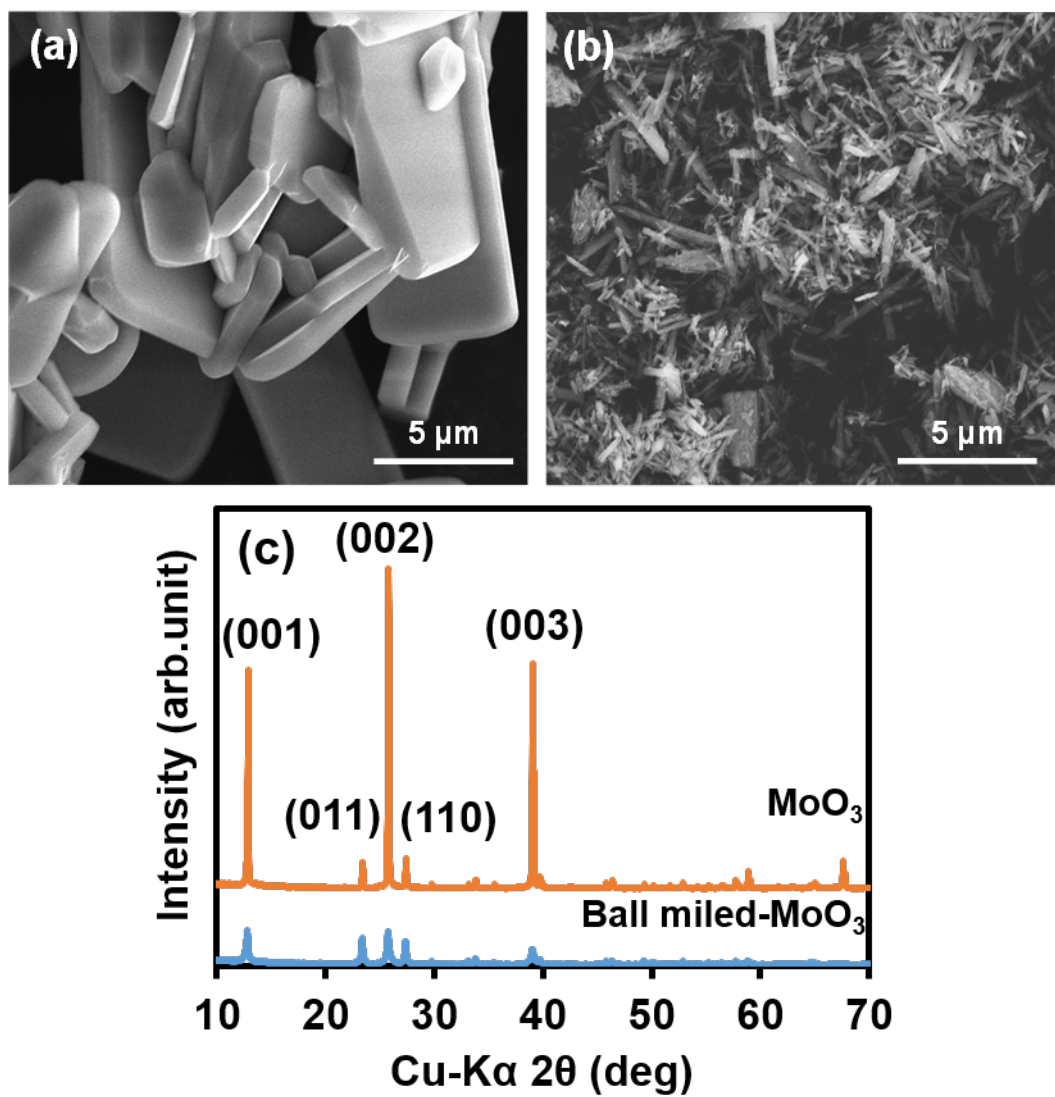

Fig. S1 SEM images of (a) pristine  $\text{MoO}_3$  (b) Ball-milled  $\text{MoO}_3$ , (c) The XRD patterns of  $\text{MoO}_3$  before and after the ball-milling

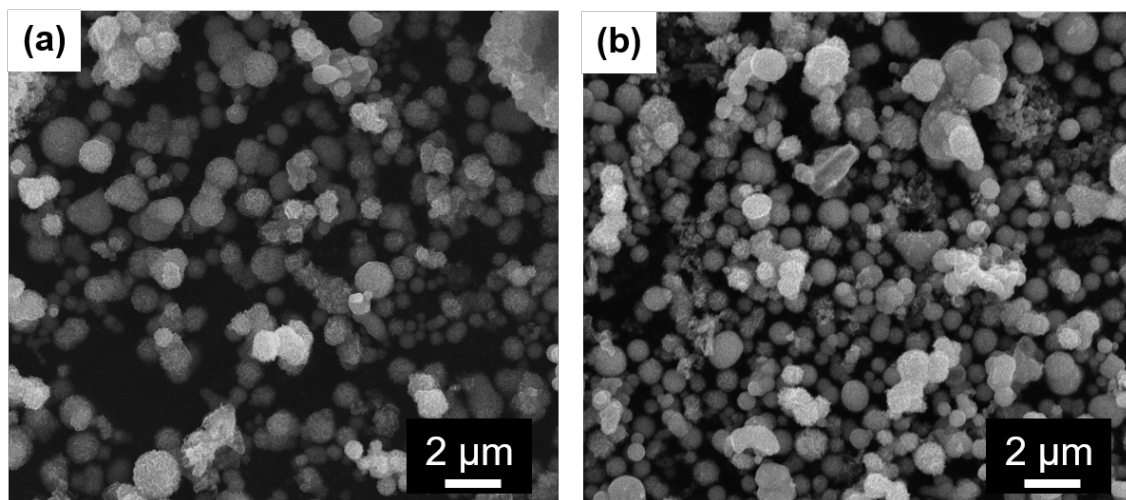

Fig. S2 Cooling-time dependence on the morphology of MoS<sub>2</sub> by SEM observation

(a) Rapid cooling (Put the reactor in water bath)

(b) Slow cooling (Leave the reactor in the air for 30 min)

## Hansen solubility parameters between MoS<sub>2</sub> and SC EtOH

The solubility parameter used in the latest study is Hansen's solubility parameter (HSP),<sup>1)</sup> which separates the contribution of dispersion ( $\delta_D$ ), polarity ( $\delta_P$ ), and hydrogen bond ( $\delta_H$ ). The closer the values of the solubility parameters of the solvent and solute are, the higher is the solubility. In order to obtain comprehensive solubility ( $\delta_T$ ), the following formula is used.

$$\delta_T^2 = \delta_D^2 + \delta_P^2 + \delta_H^2 \quad (1)$$

To use HSP, the interaction radius ( $R_0$ ) and distance ( $R_a$ ) between HSPs are required. Generally, when determining the HSP of a substance, its solubility is examined using solvents (about 20 in number) whose HSPs are already known. When the HSPs of solvents that can dissolve the substance and of those that cannot dissolve the substance are plotted in a three-dimensional space, the solvents that can dissolve the substance collect in a similar region. A sphere can be drawn to encompass all the points representing solvents that can dissolve the substance while excluding all the points representing solvents that cannot dissolve the substance. The center of the sphere is defined as the HSP of the substance. The radius of the sphere is  $R_0$ , the interaction radius. A substance with a long radius  $R_0$  can easily dissolve in a number of solvents, and one with a short radius dissolves in only a few solvents. The center coordinate of the sphere is defined as the HSP value of the substance. To calculate the distance ( $R_a$ ) between the HSP value of a solvent and the HSP value of the substance, the following equation is used.

$$R_a^2 = 4 \left( \delta_{D, S1} - \delta_{D, S2} \right)^2 + \left( \delta_{P, S1} - \delta_{P, S2} \right)^2 + \left( \delta_{H, S1} - \delta_{H, S2} \right)^2 \quad (2)$$

(S1: Solvent S2: Substance)

In general, however, HSP can only be applied under ambient conditions. Therefore, the HSP presently derived under supercritical conditions where physical properties fluctuate greatly depending on variations in temperature and pressure cannot be applied to SCFs. In 2004, a study to estimate the HSP of supercritical CO<sub>2</sub> was carried out, according to Ref. 2). The formula of HSP used in supercritical CO<sub>2</sub> is given below. To determine  $\delta_D$ ,  $\delta_P$  and  $\delta_T$ , (3), (4) and (5) were used for all SC EtOH in this study.

$$\frac{\delta_D}{\delta_{D,ref}} = \left( \frac{V_{ref}}{V} \right)^{1.25} \quad (3)$$

$$\frac{\delta_P}{\delta_{P,ref}} = \left( \frac{V_{ref}}{V} \right)^{0.5} \quad (4)$$

$$\frac{\delta_H}{\delta_{H,ref}} = \frac{1}{\exp \left[ -1.32 \times 10^{-3} (T_{ref} - T) - \ln \left( \frac{V_{ref}}{V} \right)^{0.5} \right]} \quad (5)$$

( $V$ : Volume per molar,  $T$ : Temperature,  $ref$ : Each parameter at ambient conditions)

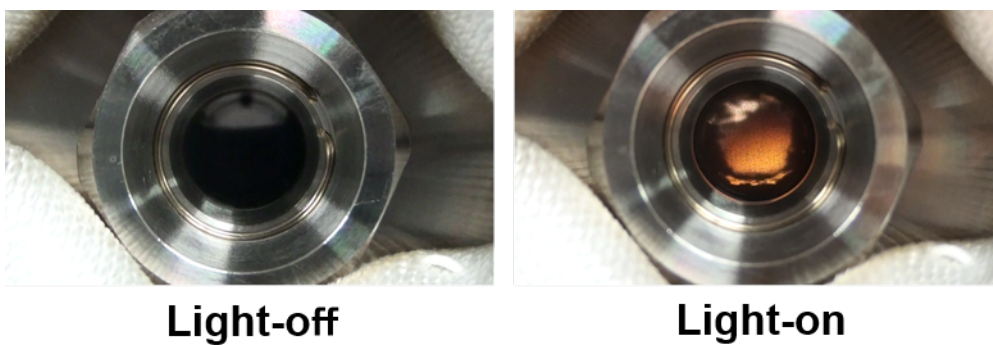

Fig.S3 Supercritical visualization reaction cell: SCF sulfurization of  $\text{MoO}_3$  is demonstrated using 0.4 g/mL EtOH density (Light-on means illumination from behind the reaction cell.).

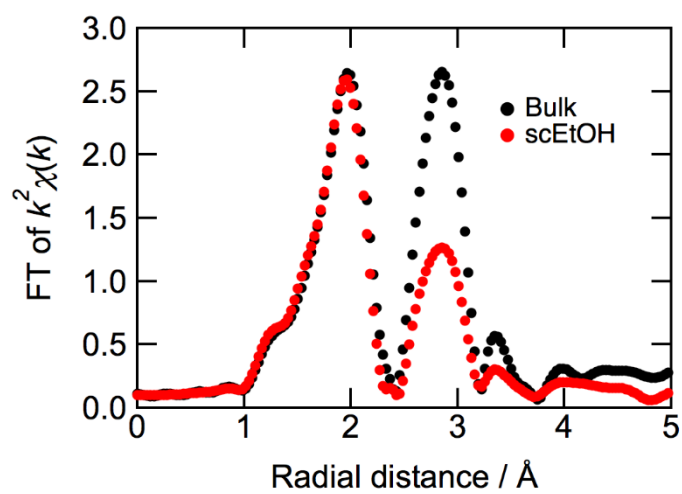

Fig.S4 The Fourier transformed  $k^2$ -weighted EXAFS plotted as a radial structure function.

Table S1 Detailed fitting parameters.

|      | amp <sub>Mo-S</sub> | amp <sub>Mo-Mo</sub> | ampS/a<br>mpMo | $N_{\text{Mo-S}}/N_{\text{Mo-Mo}}$ | $r_{\text{Mo-S}}$ | $r_{\text{Mo-Mo}}$ | $\sigma^2_{\text{Mo-S}}$ | $\sigma^2_{\text{Mo-Mo}}$ | R-factor |
|------|---------------------|----------------------|----------------|------------------------------------|-------------------|--------------------|--------------------------|---------------------------|----------|
| Bulk | 0.85(7)             | 1.2(1)               | 0.7(1)         | 1                                  | 2.405(5)          | 3.170(4)           | 0.0026(6)                | 0.0034(5)                 | 0.0063   |
| EtOH | 0.88(5)             | 0.7(1)               | 1.3(2)         | 1.8(4)                             | 2.406(4)          | 3.167(4)           | 0.0031(4)                | 0.0043(8)                 | 0.0044   |

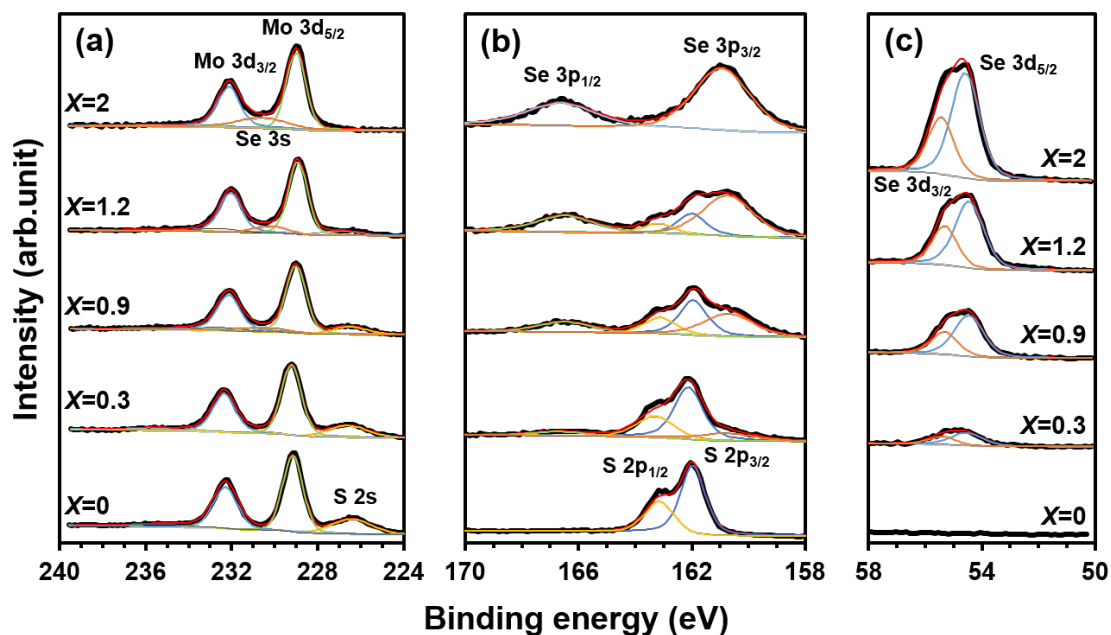

Fig.S5 The results of XPS for  $\text{MoS}_{2-x}\text{Se}_x$  (a) Mo 3d, S 2s (b) S/Se 2p (c) Se 3d

The figures illustrate the Mo 3d, S/Se 2p, and Se 3d high resolution spectra of them. The Mo 3d peaks located at  $\sim 229$  eV and  $\sim 232$  eV can be attributed to the doublet of Mo  $3d_{5/2}$  and Mo  $3d_{3/2}$  and as the introduction of sulfur, the peak of S 2s gradually increases shown in Fig.S5(a). The binding energy for S  $2p_{3/2}$  and S  $2p_{1/2}$  are 162.0 eV and 163.3 eV, and the binding energies of Se  $3p_{3/2}$  and Se  $3p_{1/2}$  at 160.8 and 166.6 eV indicate the chemical oxidation state of  $\text{Se}^{2-}$ , shown in Fig. S5 (b). As the composition rate changes, the peaks shift to each other. The doublet peak of Se  $3d_{3/2}$  and Se  $3d_{5/2}$  is shown in Fig.S5(c). As the introduction of selenium, the peak intensity gradually increases.



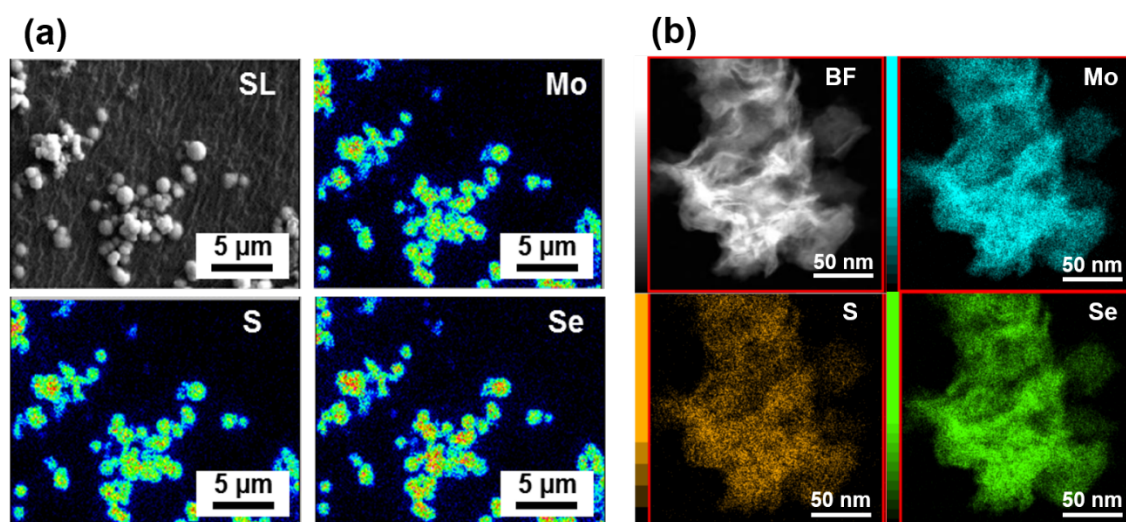

Fig.S6 The distribution of Mo, S and Se in  $\text{MoS}_{1.1}\text{Se}_{0.9}$  with (a)SEM-WDS (b)

STEM-EDS

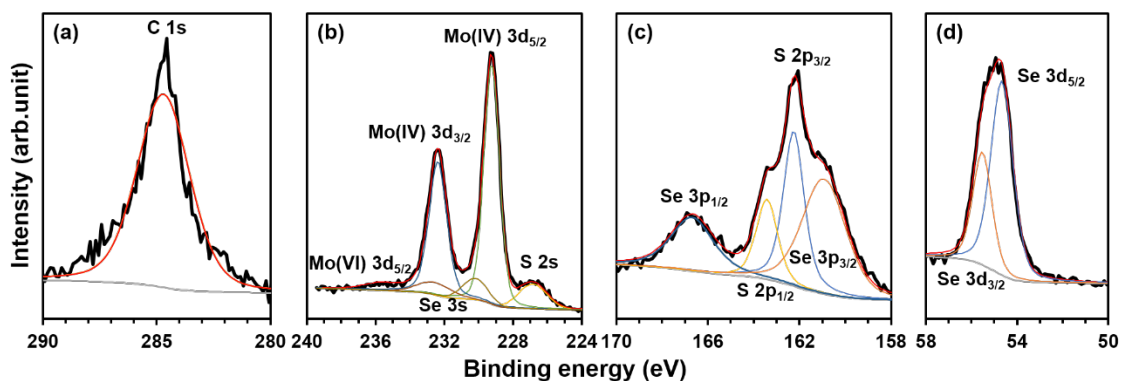

Fig.S7 The results of XPS for MoS<sub>0.9</sub>Se<sub>1.1</sub>/rGO

(a)C 1s (b)Mo 3d, S 2s (c) S/Se 2p (d) Se 3d

No peaks for hexavalent molybdenum derived from MoO<sub>3</sub> were observed. It is known that the degree of reduction of rGO can be determined from the C1s peak and the amount of functional carbon groups containing oxygen can be evaluated by the peak intensities of C–O (epoxy and alkoxy), C=O, and O–C=O functional groups, observed at 286.8, 287.3, and 289.4 eV, respectively.<sup>3)</sup> We observed little peaks of them for the MoS<sub>0.9</sub>Se<sub>1.1</sub>/rGO sample, suggesting that sufficient reduction of GO occurred.

## References

- 1) Hansen, C. M. The Three Dimensional Solubility Parameter. *J. Paint Technol.*, **1967**, 39, 505.
- 2) Williams, L. L.; Rubin, J. B.; Edwards, H. W. Calculation of Hansen Solubility Parameter Values for a Range of Pressure and Temperature Conditions, Including the Supercritical Fluid Region. *Ind. Eng. Chem. Res.*, **2004**, 43, 4967–4972.
- 3) Jana, M.; Saha, S.; Khanra, P.; Murmu, N. C.; Srivastav, S. K.; Kuila, T.; Lee, J. H. Bio-Reduction of Graphene Oxide Using Drained Water from Soaked Mung Beans (*Phaseolus aureus* L.) and Its Application as Energy Storage Electrode Material. *Mater. Sci. Eng. B* **2014**, 186, 33–40.
